# Supplementary material for: Bystander Response and Out-of-Hospital Cardiac Arrest Outcomes (Bro. Study) in 3 Gulf Countries: Protocol for a Prospective, Observational, International Collaboration Study
Source: PubMed Central journal article supplement (PMC11599888; doi:10.2196/58780), 2024-11-12
Supplement: resprot_v13i1e58780_app1.pdf [file resprot_v13i1e58780_app1.pdf]

**Appendix 1: Out-of-Hospital Cardiac Arrest Variables and Response Options.**

| <i>Category</i>                      | <i>Data Heading</i>                               | <i>Response Options</i>      |
|--------------------------------------|---------------------------------------------------|------------------------------|
| <b><i>Demographics</i></b>           | Age                                               |                              |
|                                      | Sex                                               |                              |
|                                      | Nationality                                       |                              |
|                                      | Country                                           |                              |
|                                      | Presenting Hospital                               |                              |
|                                      | Co-morbidities                                    |                              |
| <b><i>Mode of Transportation</i></b> | The patient was brought in by                     | - Ambulance                  |
|                                      |                                                   | - ALS/Air                    |
|                                      |                                                   | - ALS/Ambulance              |
|                                      |                                                   | - BLS/Ambulance              |
|                                      |                                                   | - Carried                    |
|                                      |                                                   | - Helicopter                 |
|                                      |                                                   | - Police                     |
|                                      |                                                   | - Private vehicle            |
|                                      |                                                   | - Walking                    |
|                                      |                                                   | - Wheelchair                 |
| - Other                              |                                                   |                              |
| <b><i>Incident Information</i></b>   | Location Type                                     | - Home/Residence             |
|                                      |                                                   | - Healthcare Facility        |
|                                      |                                                   | - EMS/Private ambulance      |
|                                      |                                                   | - Public/Commercial building |
|                                      |                                                   | - Street/Highway             |
|                                      |                                                   | - Industrial/Workplace       |
|                                      |                                                   | - Transport centers          |
|                                      |                                                   | - Nursing home               |
|                                      |                                                   | - Sport/recreation place     |
|                                      |                                                   | - Other                      |
| <b><i>Patient Information</i></b>    | Past medical history                              | Available on Cerner          |
|                                      | Ability to perform daily activities independently | - Yes                        |
|                                      |                                                   | - No                         |
|                                      |                                                   | - Unknown                    |

***Prehospital Event  
and Resus Info***

|                                                            |                                                                                                                       |
|------------------------------------------------------------|-----------------------------------------------------------------------------------------------------------------------|
| -Patient supported by any ventricular assist device        | - Yes<br>- No<br>- Unknown                                                                                            |
| - Patient has internal/external Cardioverter-defibrillator | - Yes<br>- No<br>- Unknown                                                                                            |
| Estimated time of arrest                                   | - Known (Insert date/time)<br>- Unknown                                                                               |
| EMS arrival time                                           | - Known (Insert date/time)<br>- Unknown                                                                               |
| Arrest Witnessed by                                        | - Not witnessed<br>- First responder<br>- EMS/Private Ambulance<br>- Bystander (Family/Healthcare Provider/Layperson) |
| Bystander CPR                                              | - Yes<br>- No<br>- NA                                                                                                 |
| Bystander AED Applied                                      | - Yes<br>- No<br>- NA                                                                                                 |
| First CPR initiated by                                     | - No CPR initiated<br>- First responder<br>- Ambulance Crew<br>- Bystander (Family/Healthcare provider/Layperson)     |
| Date & Time of CPR Started by EMS/Private ambulance        | Specify date DD-MM-YYYY<br>specify time HH (24-hour format)                                                           |
| Resuscitation Attempted by EMS                             | - Yes<br>- No                                                                                                         |
| First Arrest Rhythm                                        | - VF<br>- VT<br>- Asystole<br>- PEA<br>- Unknown                                                                      |

|                                                         |                                                                                                                                                        |
|---------------------------------------------------------|--------------------------------------------------------------------------------------------------------------------------------------------------------|
| Prehospital defibrillation                              | - Yes (Insert time of the first shock, number of shocks)<br>- No<br>- Unknown                                                                          |
| Defibrillation performed by                             | - NA<br>- First responder<br>- Ambulance crew<br>- Bystander (Family/Healthcare provider/Layperson)                                                    |
| Mechanical CPR device used by EMS/private ambulance     | - Yes<br>- No                                                                                                                                          |
| Prehospital advanced airway                             | - Yes (Specify ETT/Surgical airway/SGAD)<br>- No                                                                                                       |
| Prehospital drug administration                         | - Yes<br>- No<br>_If yes specify the drug<br>(Epinephrine/Amiodarone/Bicarbonate/Lidocaine/Dextrose/Other)<br>Specify the number of Epi given.         |
| ROSC at Scene/En-route                                  | - Yes<br>- No                                                                                                                                          |
| CPR discontinued at the scene                           | -Yes<br>-No<br>-If yes, specify the reason<br>(DNAR, Medical control order, ROSC, Obvious signs of death)                                              |
| <b><i>EMS Disposition</i></b> Final Status at the scene | - Conveyed to ED<br>- Pronounced dead at the scene                                                                                                     |
| Cause of Arrest                                         | - Trauma<br>- non-Trauma<br>If non-trauma, please specify (Presumed cardiac aetiology/Electrocution/Drug overdose/Respiratory/Asphyxia/Drowning/Other) |
| Patient Status at ED                                    | Ongoing resuscitation<br>ROSC<br>Brought in dead                                                                                                       |

**ED Resuscitation  
Information**

|                                 |                                                                                                                                      |
|---------------------------------|--------------------------------------------------------------------------------------------------------------------------------------|
| Patient Status on arrival at ED | - Insert Date/Time on arrival at ED<br>- Pulse: Yes/No<br>- Breathing: Yes/No                                                        |
| Cardiac rhythm on arrival at ED | - VF<br>- VT<br>- Bradycardia<br>- Asystole<br>- PEA<br>- Sinus/Other perfusing rhythm                                               |
| ED defibrillation performed     | - Yes (Insert number of shocks)<br>- No                                                                                              |
| Mechanical CPR device used      | - Yes<br>- No                                                                                                                        |
| Advanced airway                 | - Yes (ETT/Surgical airway/SGAD)<br>- No                                                                                             |
| Vascular access type            | - IV<br>- IO<br>- Central line<br>- Endotracheal                                                                                     |
| Drug administration             | - Yes<br>- No<br>If yes Specify drugs<br>(Epinephrine/Amiodarone/Bicarbonate/Lidocaine/Dextrose/Other)<br>Specify times of Epi given |
| Arterial Line                   | - Yes<br>- No                                                                                                                        |
| VBG/ABG during resuscitation    | - Yes<br>- No                                                                                                                        |
| POCUS during Resuscitation      | - Yes (Specify findings)<br>- No                                                                                                     |
| ROSC                            | - Yes<br>- No                                                                                                                        |
| ECMO therapy initiated          | - Yes<br>- No                                                                                                                        |
| PCI Activated Score             | Specify                                                                                                                              |

***Outcome Data***

|                                     |                                                                                                                                                                                                               |
|-------------------------------------|---------------------------------------------------------------------------------------------------------------------------------------------------------------------------------------------------------------|
| Coronary reperfusion attempted      | - Yes (Thrombolysis/PCI/CABG)<br>- No                                                                                                                                                                         |
| Cause of arrest                     | - Trauma<br>- Non-trauma (Presumed cardiac aetiology/Respiratory/Asphyxia/Electrocution/Drowning/Drug overdose/Other)                                                                                         |
| Outcome of patient                  | - Admitted (ICU/CCU/Other)<br>- Died in ED<br>- Transferred to another hospital<br>- Died in hospital (Insert time of death, cause of death, resuscitation status)<br>- Survived and discharged from hospital |
| Discharge Destination               | Specify                                                                                                                                                                                                       |
| Neurological status at discharge    | Specify (CEREBRAL PERFORMANCE SCORE)                                                                                                                                                                          |
| Length of stay in ICU               | Specify (Hours)                                                                                                                                                                                               |
| Total length of stay in hospital    | Specify (Hours)                                                                                                                                                                                               |
| Neurological status at three months | Specify (CEREBRAL PERFORMANCE SCORE)                                                                                                                                                                          |
